# Supplementary material for: Retrieval of snowflake microphysical properties from multifrequency radar observations
Source: Copernicus journal article supplement (doi:10.5194/amt-11-5471-2018), 2018-10-05
Supplement: Supplementary file 1 [file amt-11-5471-2018-supplement.pdf]

Supplement of Atmos. Meas. Tech., 11, 5471–5488, 2018  
<https://doi.org/10.5194/amt-11-5471-2018-supplement>  
© Author(s) 2018. This work is distributed under  
the Creative Commons Attribution 4.0 License.

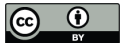

*Supplement of*

## **Retrieval of snowflake microphysical properties from multifrequency radar observations**

**Jussi Leinonen et al.**

*Correspondence to:* Jussi Leinonen ([jussi.s.leinonen@jpl.caltech.edu](mailto:jussi.s.leinonen@jpl.caltech.edu))

The copyright of individual parts of the supplement might differ from the CC BY 4.0 License.

## Contents

This supplement contains the microphysical parameter plots of Fig. 3a–c of the main article, but retrieved using different radar band combinations. The mass-weighted mean diameter is shown in Figs. S1–S7, the bulk density in Figs. S8–S14, and the ice water content in Figs. S15–S21. The prior sensitivity analysis of Fig. 6 of the main article is also shown in Figs. S22–S28 using 5 different band combinations.

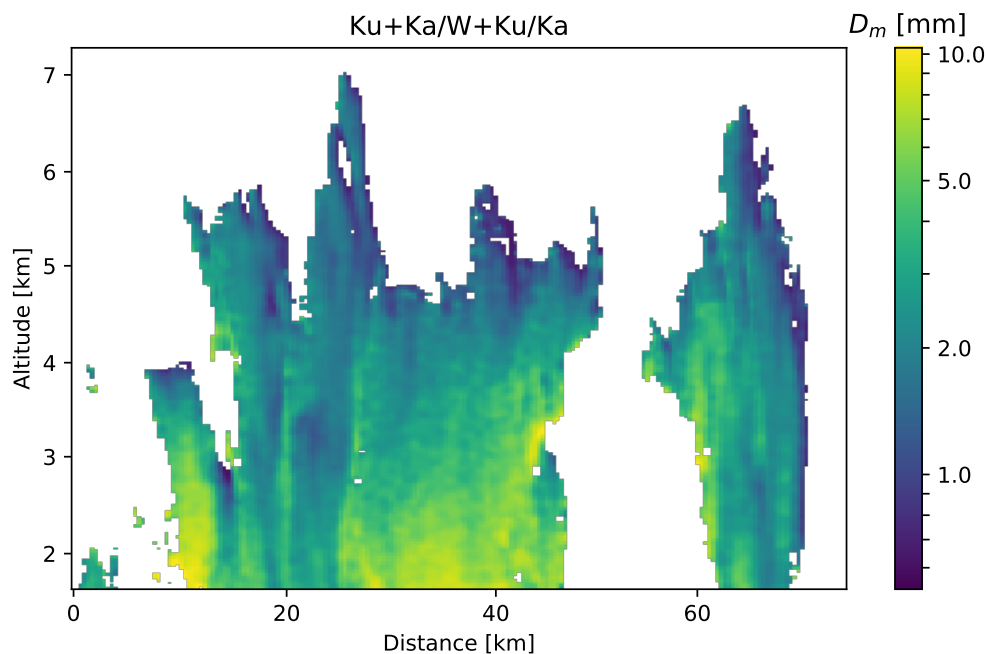

**Figure S1.** The mass-weighted mean diameter for the December 4, 2015 case, retrieved using the Ku-band reflectivity, the Ka/W band dual-wavelength ratio (DWR) and the Ku/Ka-band DWR. This plot is equivalent to Fig. 3a of the main article, but the colors have been rescaled in order to retain consistency between Figs. S1–S7.

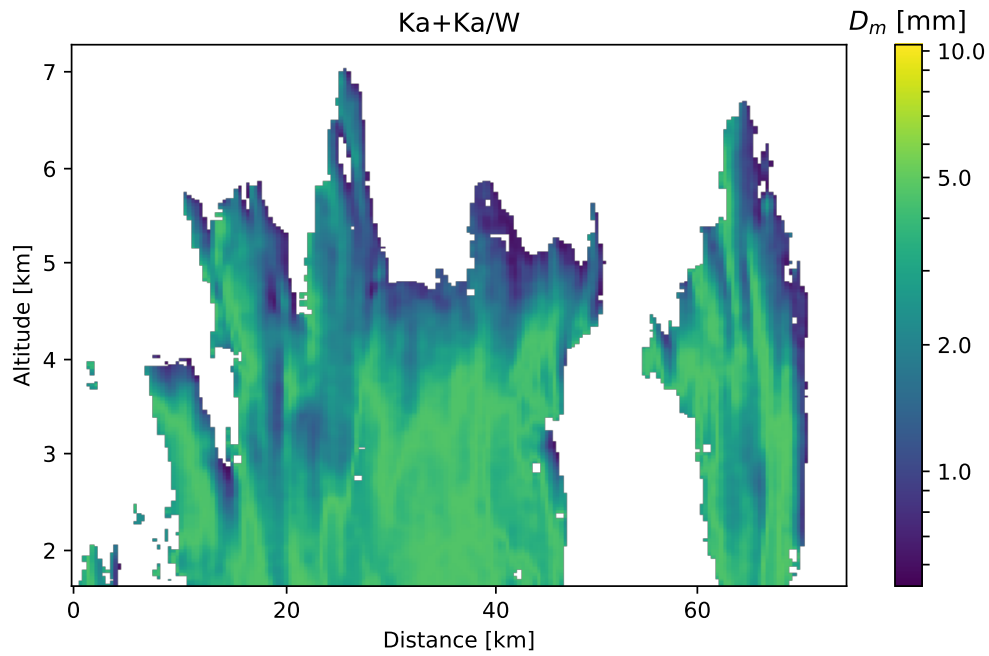

**Figure S2.** As Fig. S1, but retrieved using the Ka-band reflectivity and the Ka/W band DWR.

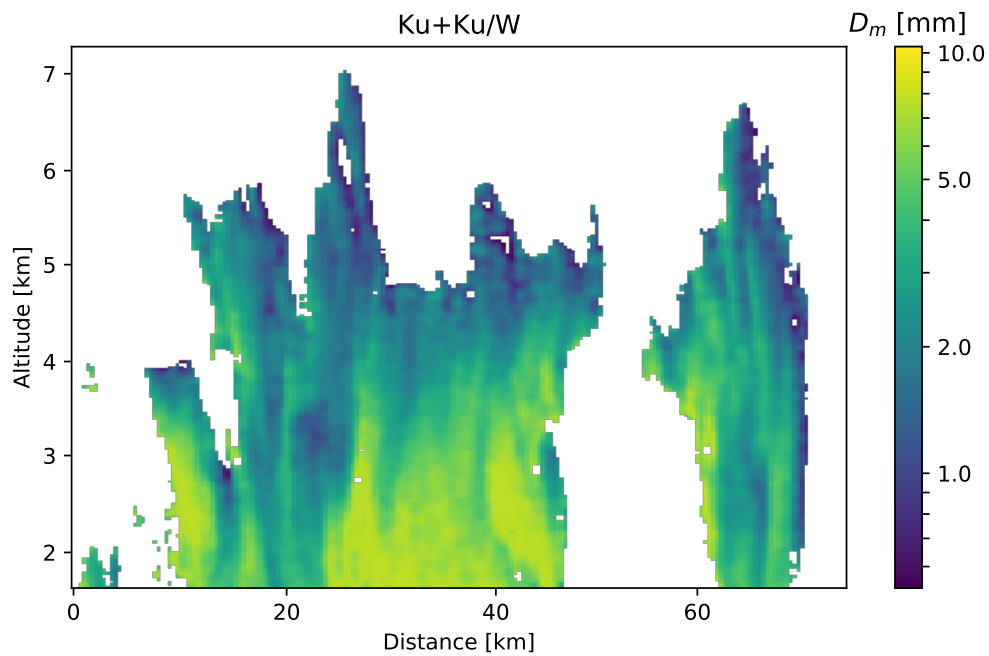

**Figure S3.** As Fig. S1, but retrieved using the Ku-band reflectivity and the Ku/W band DWR.

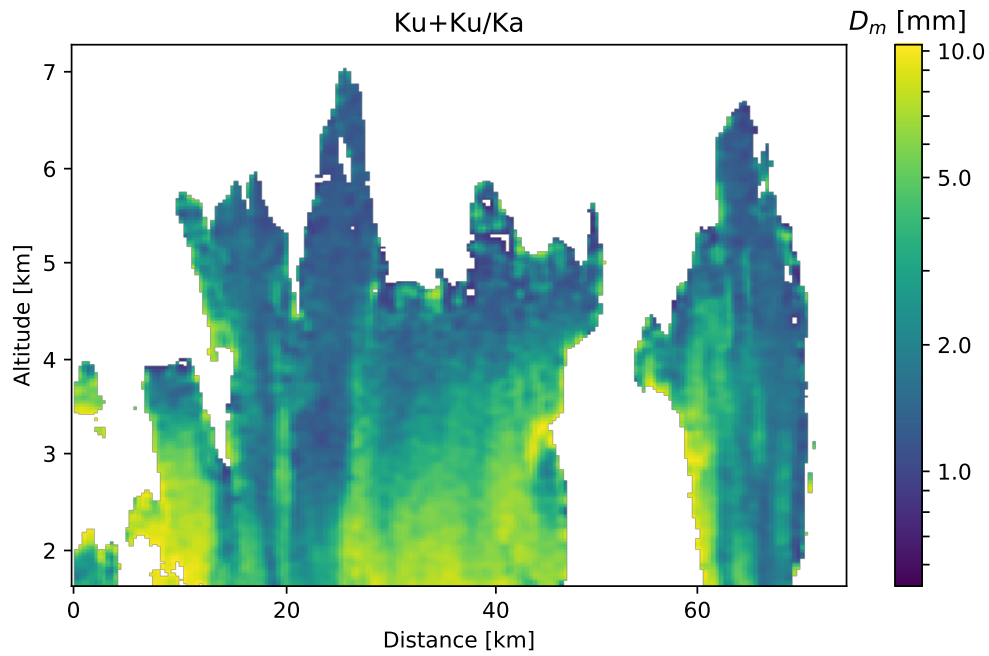

**Figure S4.** As Fig. S1, but retrieved using the Ku-band reflectivity and the Ku/Ka band DWR.

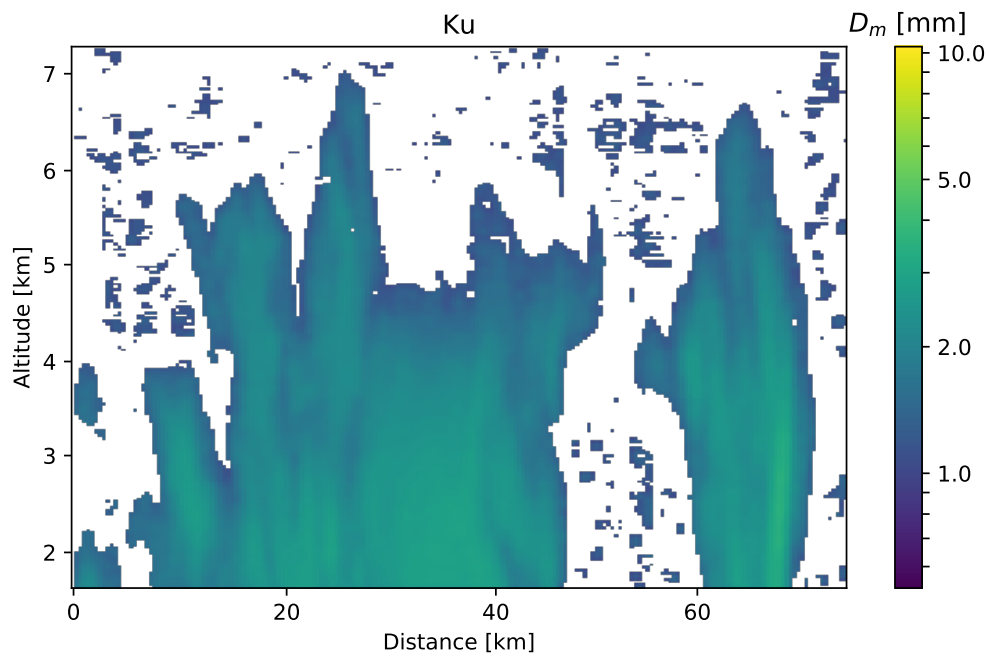

**Figure S5.** As Fig. S1, but retrieved using the Ku-band reflectivity only.

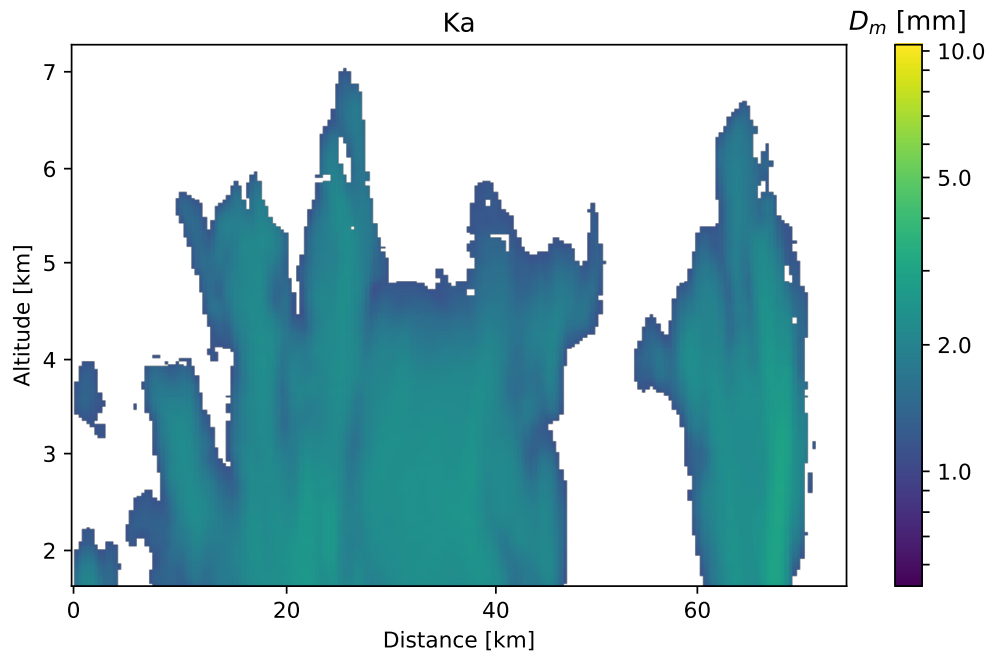

**Figure S6.** As Fig. S1, but retrieved using the Ka-band reflectivity only.

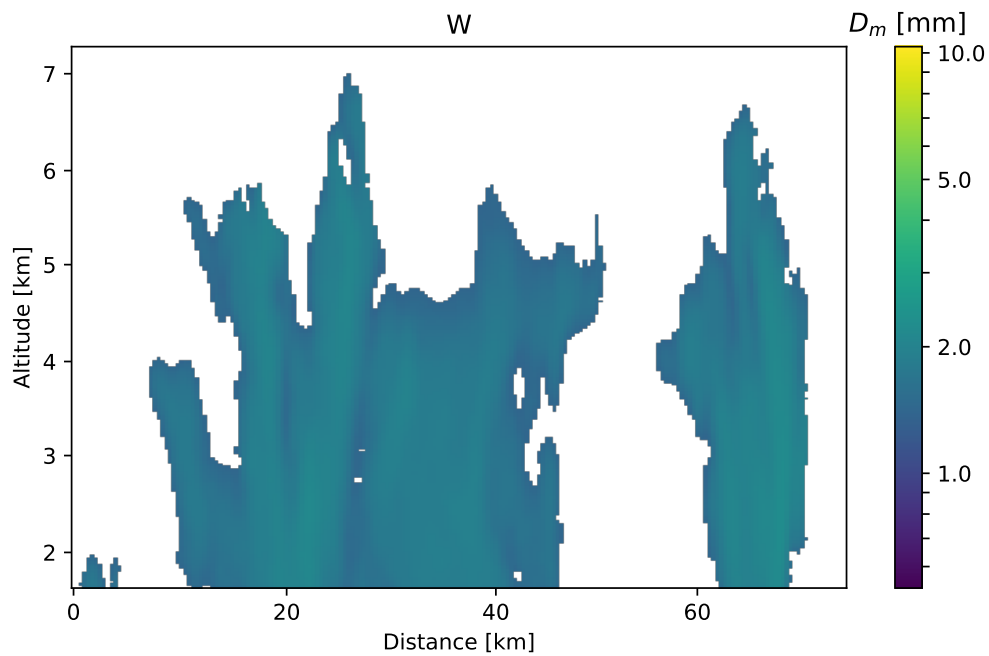

**Figure S7.** As Fig. S1, but retrieved using the W-band reflectivity only.

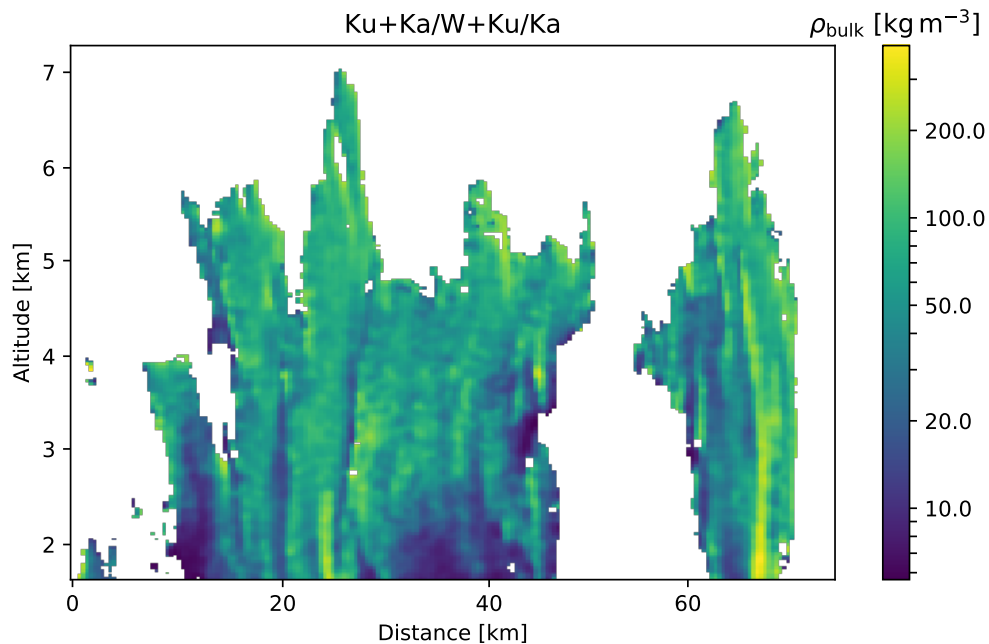

**Figure S8.** The bulk density for the December 4, 2015 case, retrieved using the Ku-band reflectivity, the Ka/W band dual-wavelength ratio (DWR) and the Ku/Ka-band DWR. This plot is equivalent to Fig. 3b of the main article, but the colors have been rescaled in order to retain consistency between Figs. S8–S14.

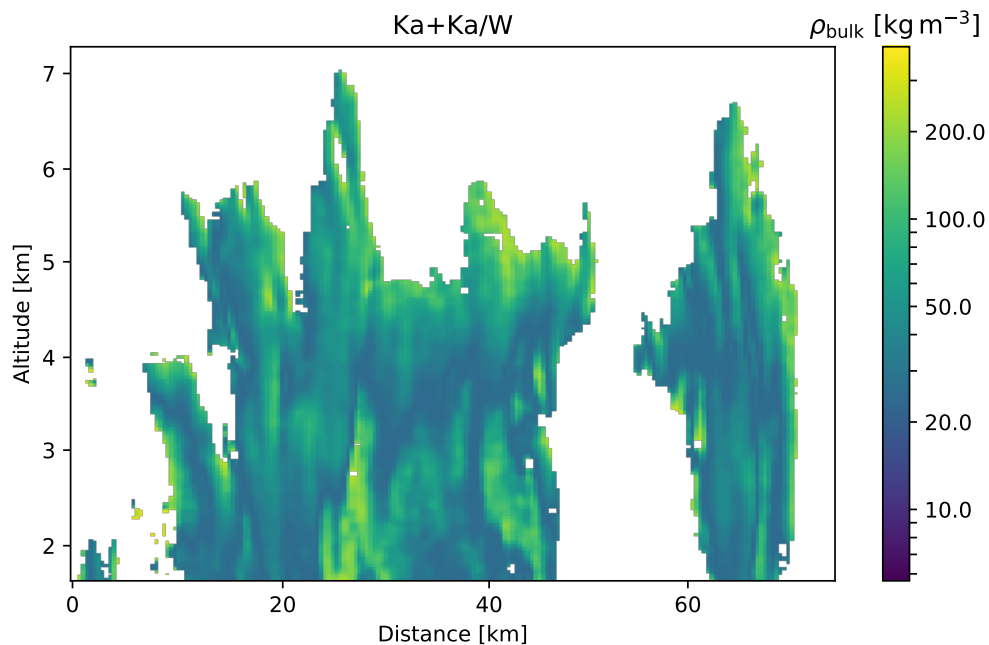

**Figure S9.** As Fig. S8, but retrieved using the Ka-band reflectivity and the Ka/W band DWR.

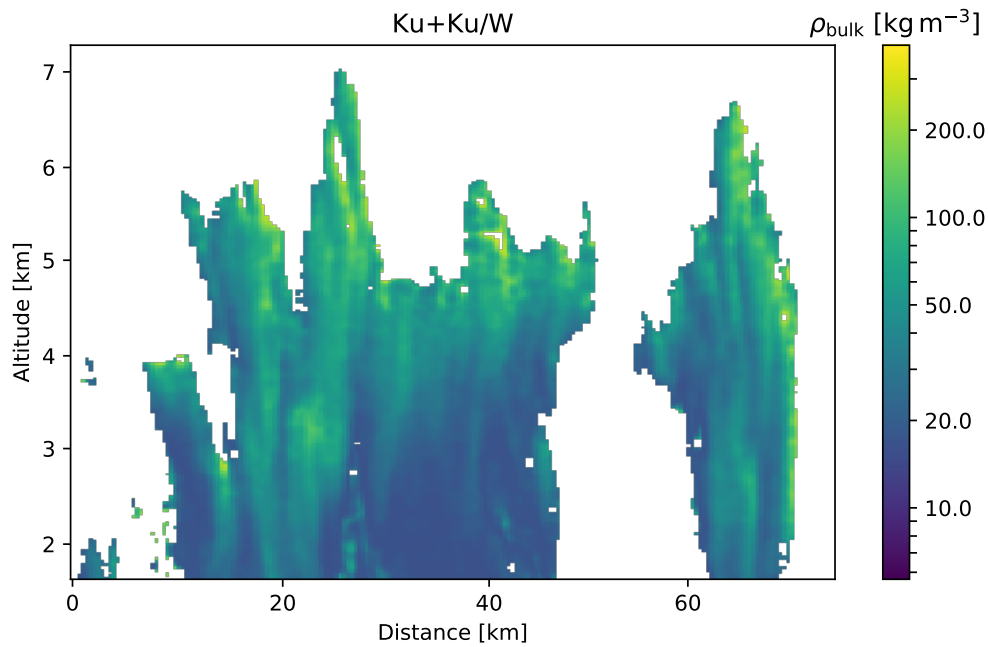

**Figure S10.** As Fig. S8, but retrieved using the Ku-band reflectivity and the Ku/W band DWR.

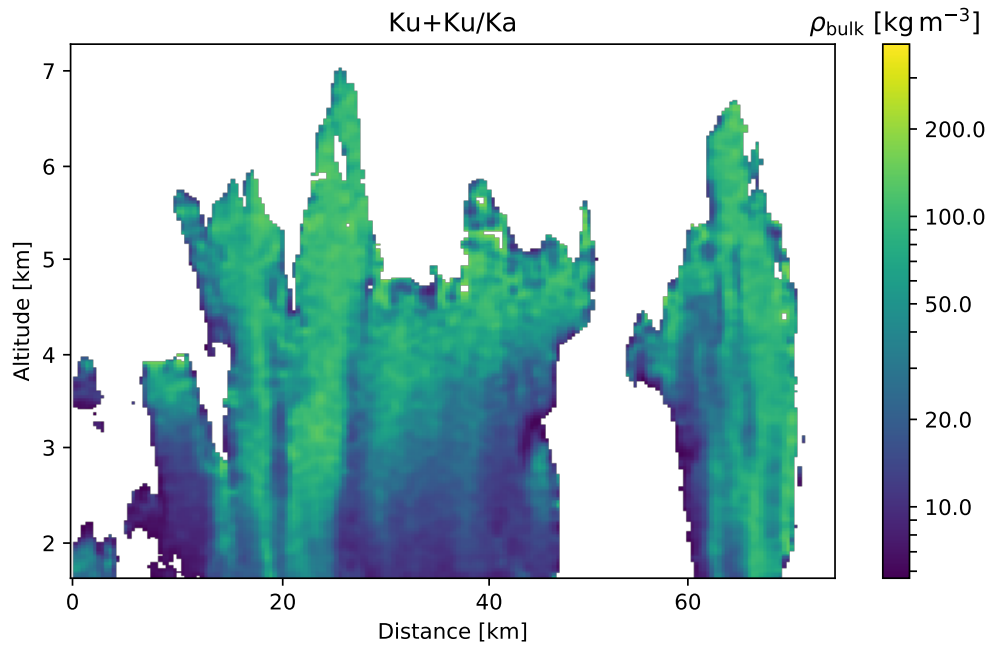

**Figure S11.** As Fig. S8, but retrieved using the Ku-band reflectivity and the Ku/Ka band DWR.

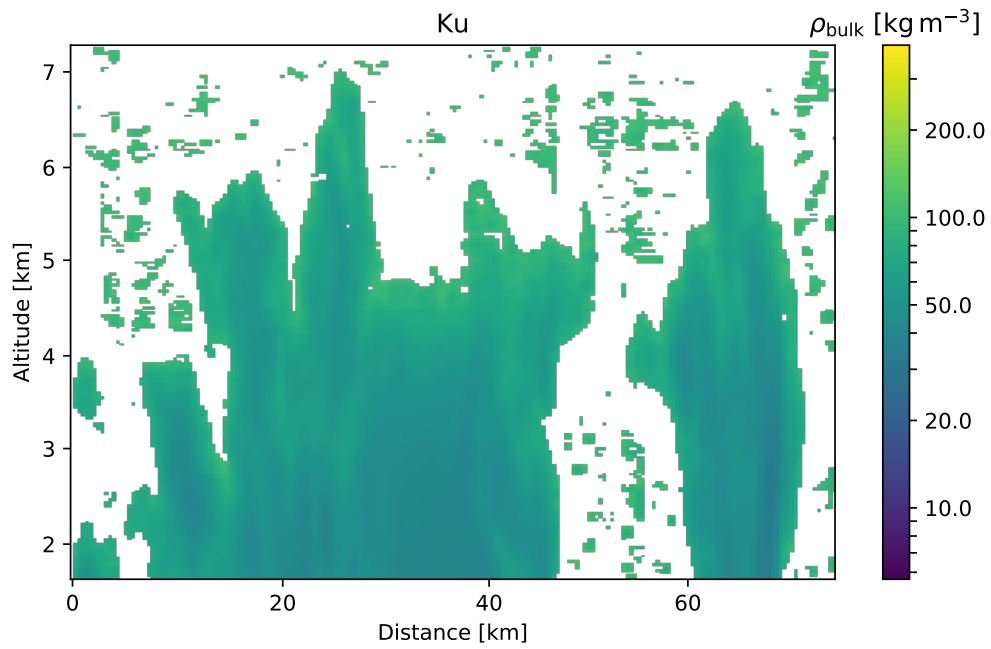

**Figure S12.** As Fig. S8, but retrieved using the Ku-band reflectivity only.

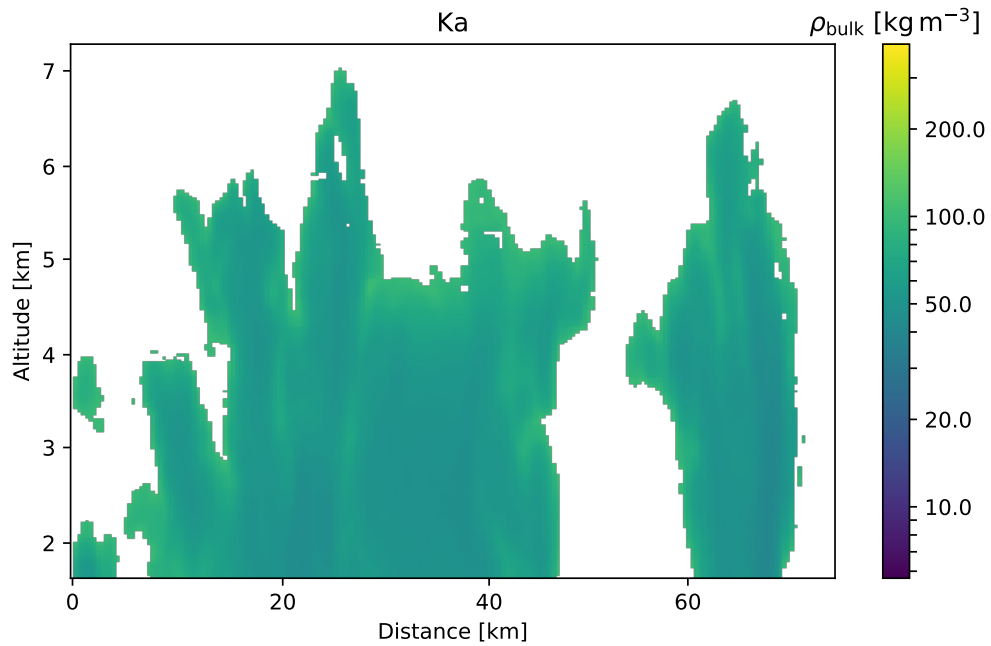

**Figure S13.** As Fig. S8, but retrieved using the Ka-band reflectivity only.



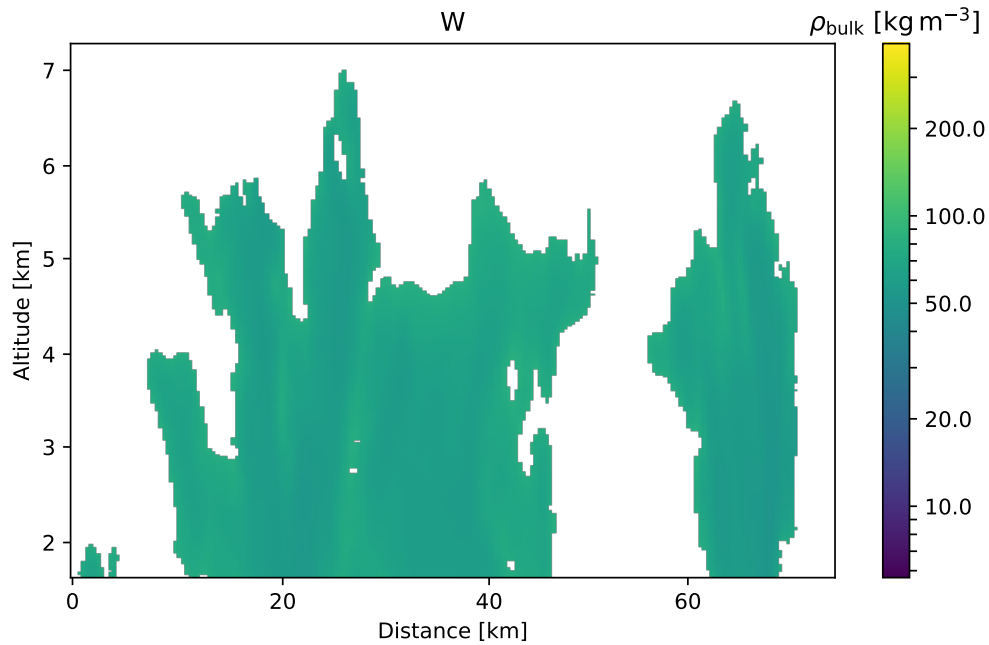

**Figure S14.** As Fig. S8, but retrieved using the W-band reflectivity only.

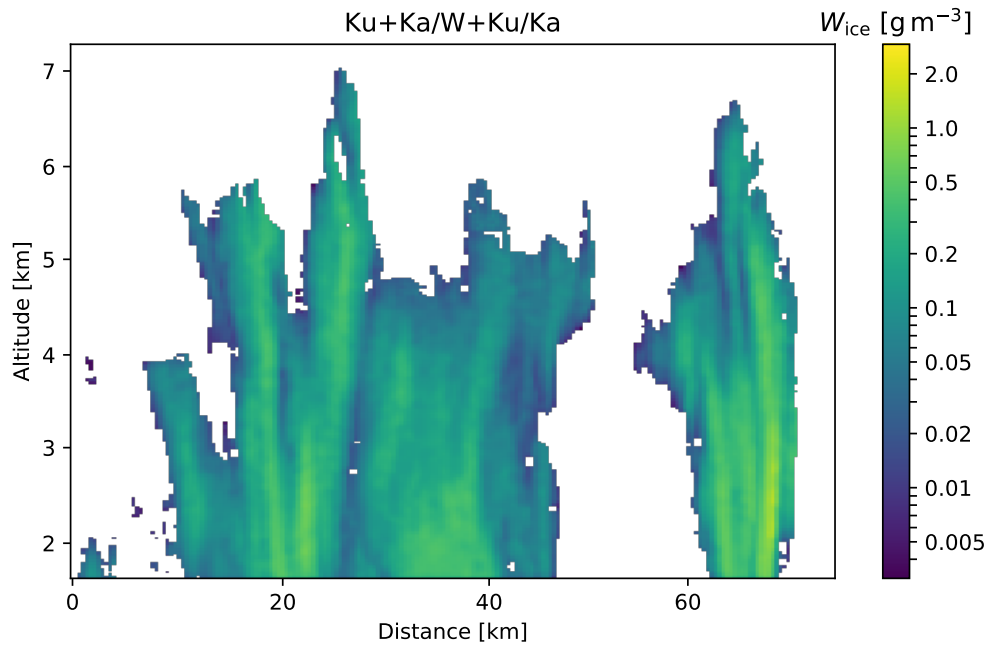

**Figure S15.** The ice water content for the December 4, 2015 case, retrieved using the Ku-band reflectivity, the Ka/W band dual-wavelength ratio (DWR) and the Ku/Ka-band DWR. This plot is equivalent to Fig. 3c of the main article, but the colors have been rescaled in order to retain consistency between Figs. S15–S21.

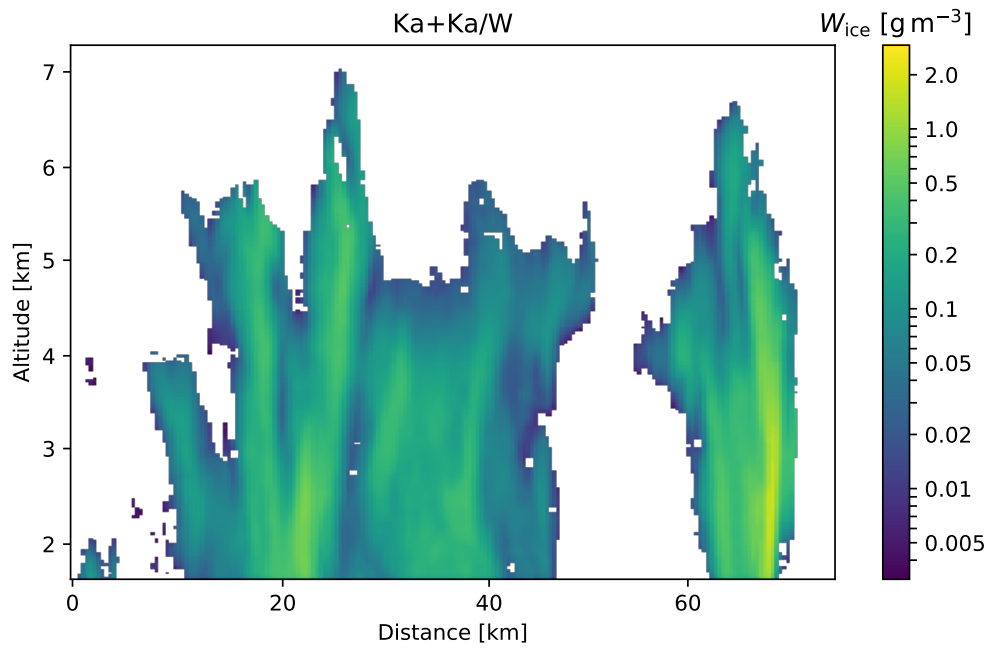

**Figure S16.** As Fig. S15, but retrieved using the Ka-band reflectivity and the Ka/W band DWR.

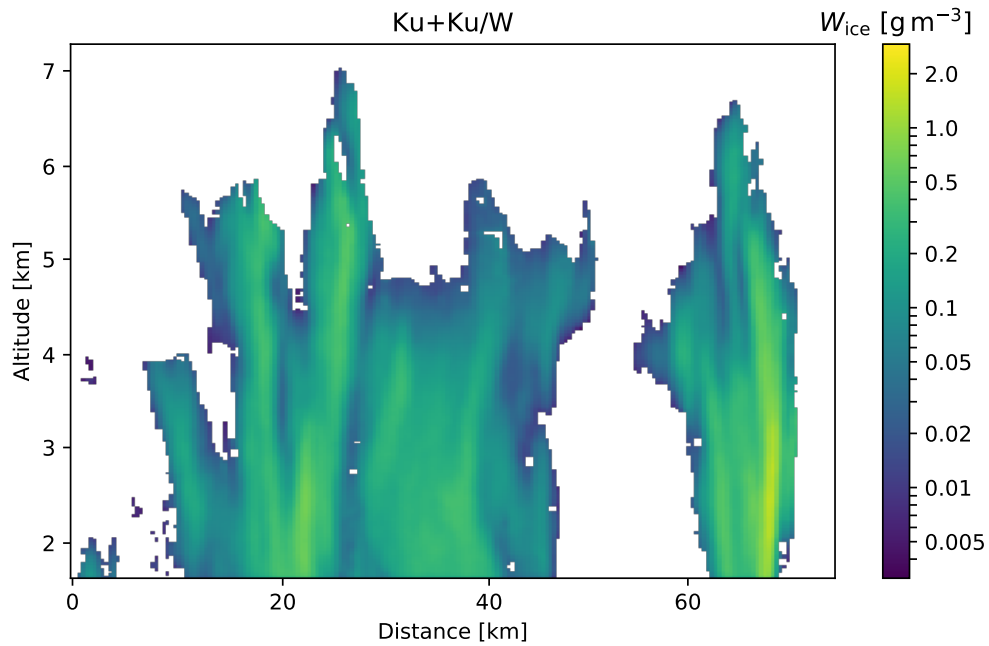

**Figure S17.** As Fig. S15, but retrieved using the Ku-band reflectivity and the Ku/W band DWR.

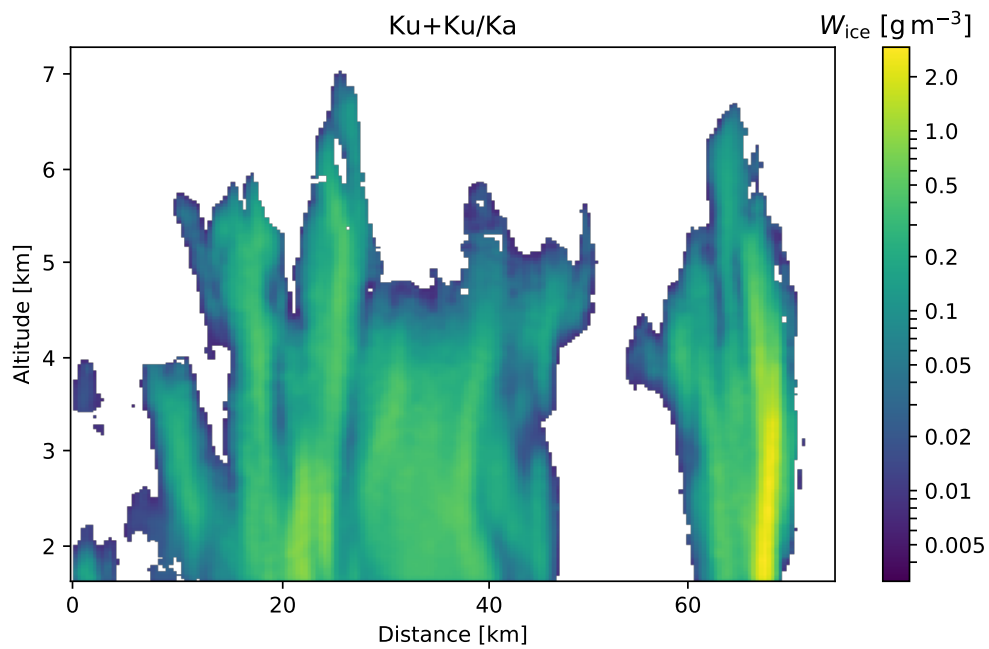

**Figure S18.** As Fig. S15, but retrieved using the Ku-band reflectivity and the Ku/Ka band DWR.

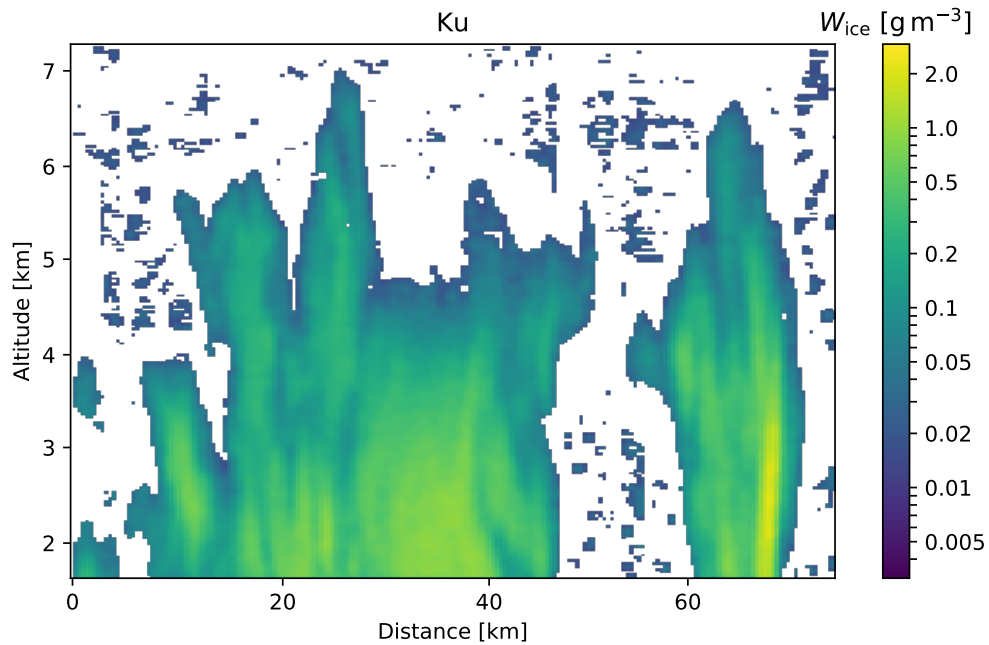

**Figure S19.** As Fig. S15, but retrieved using the Ku-band reflectivity only.

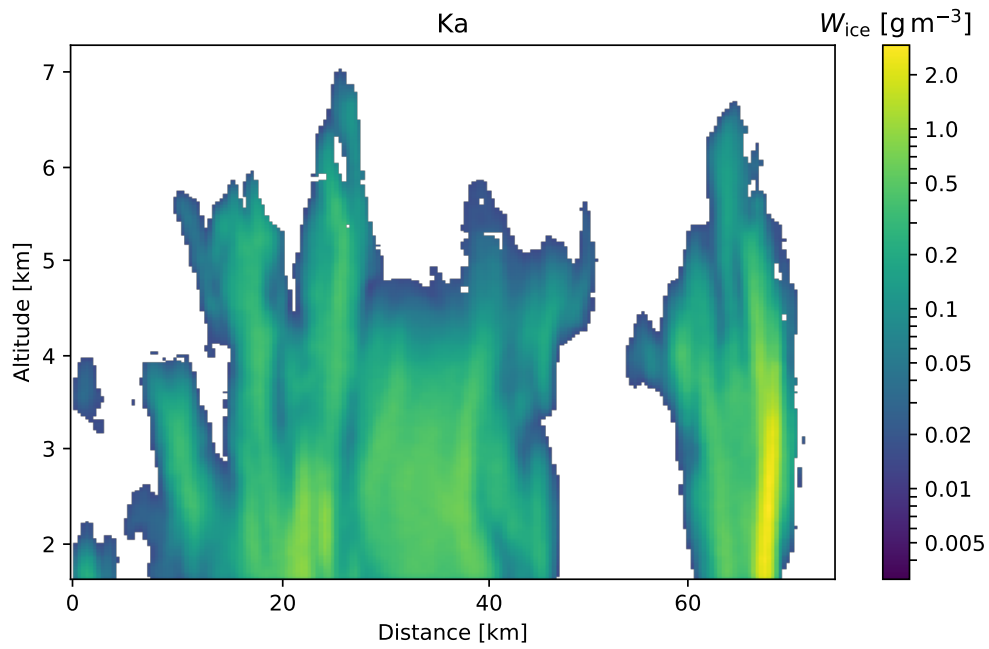

**Figure S20.** As Fig. S15, but retrieved using the Ka-band reflectivity only.

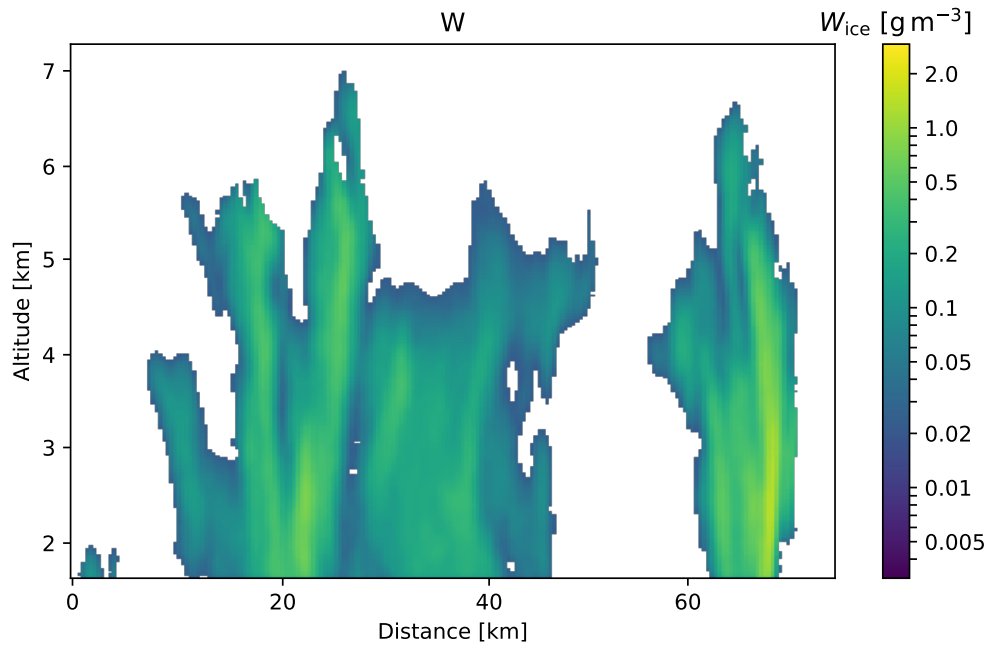

**Figure S21.** As Fig. S15, but retrieved using the W-band reflectivity only.

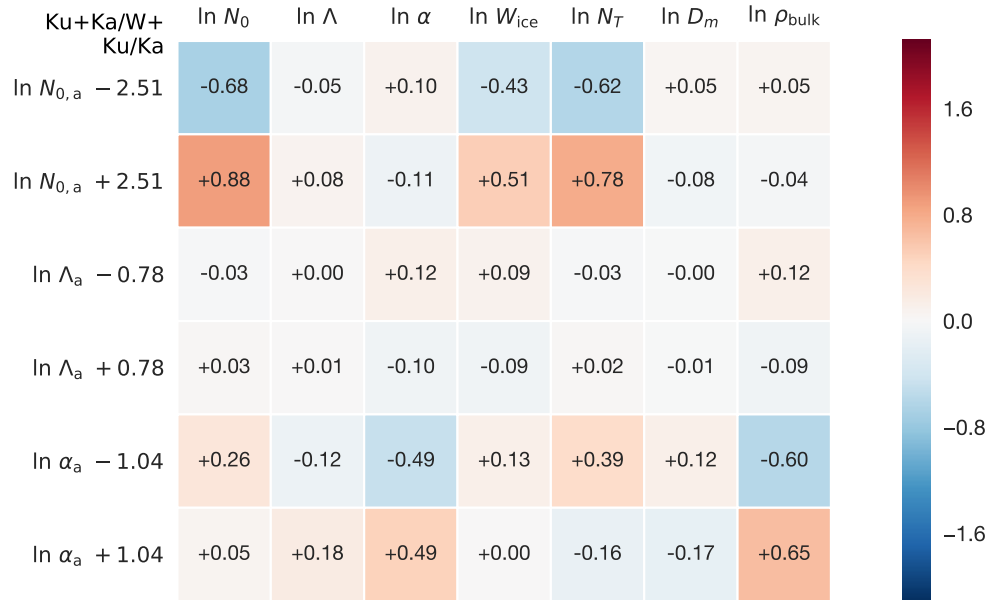

**Figure S22.** This is equivalent to the prior sensitivity study of Fig. 6 of the main article, but the colors have been rescaled for consistency between Figs. S22–S28.

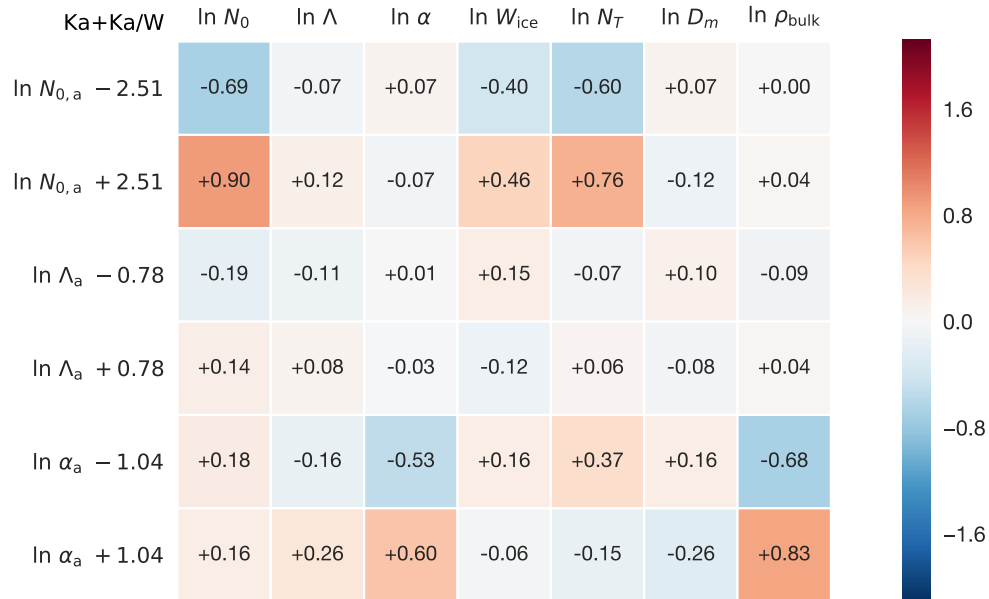

**Figure S23.** As Fig. S22, but retrieved using the Ka-band reflectivity and the Ka/W band DWR.

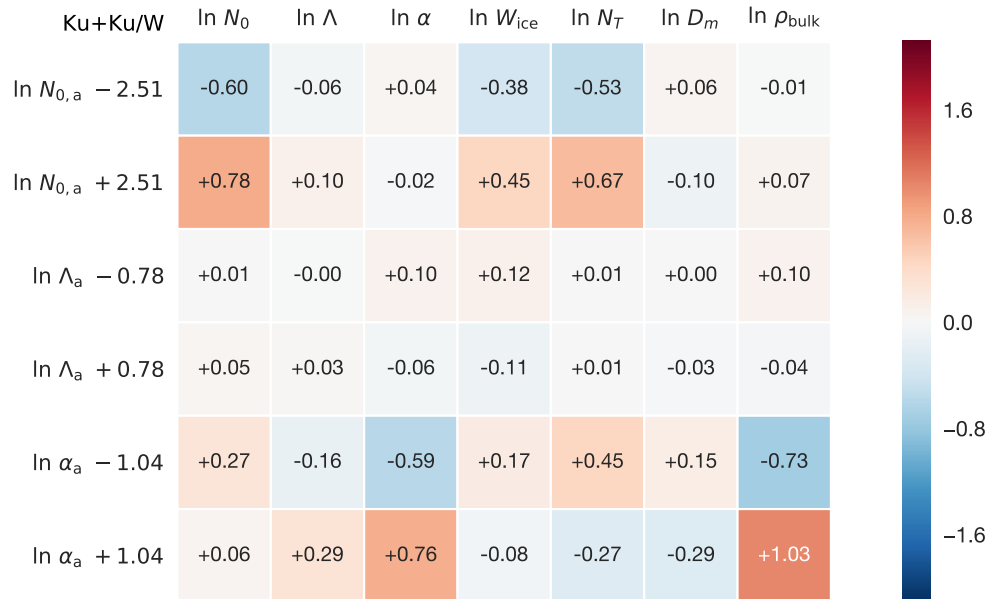

**Figure S24.** As Fig. S22, but retrieved using the Ku-band reflectivity and the Ku/W band DWR.

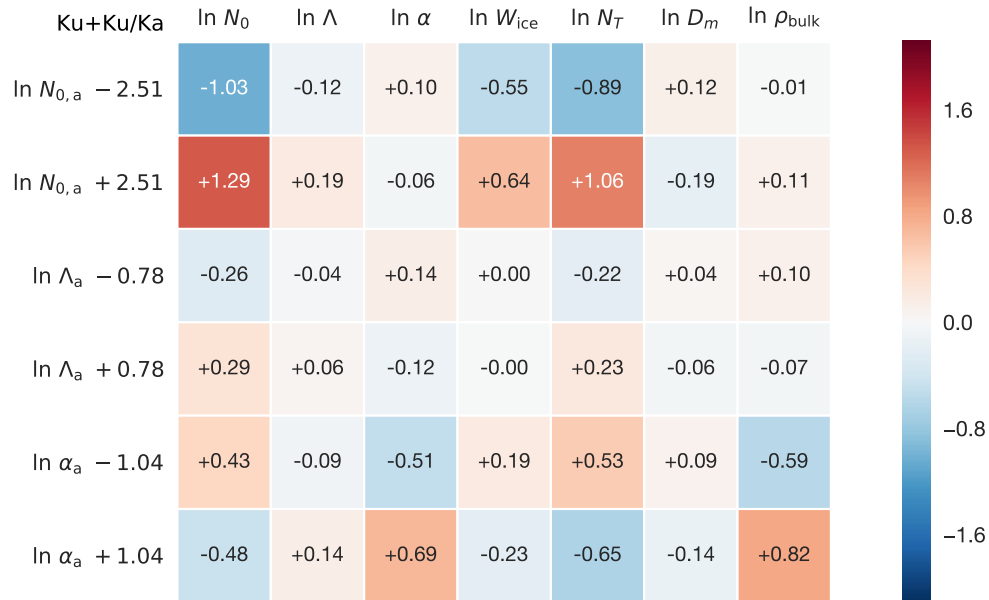

**Figure S25.** As Fig. S22, but retrieved using the Ku-band reflectivity and the Ku/Ka band DWR.

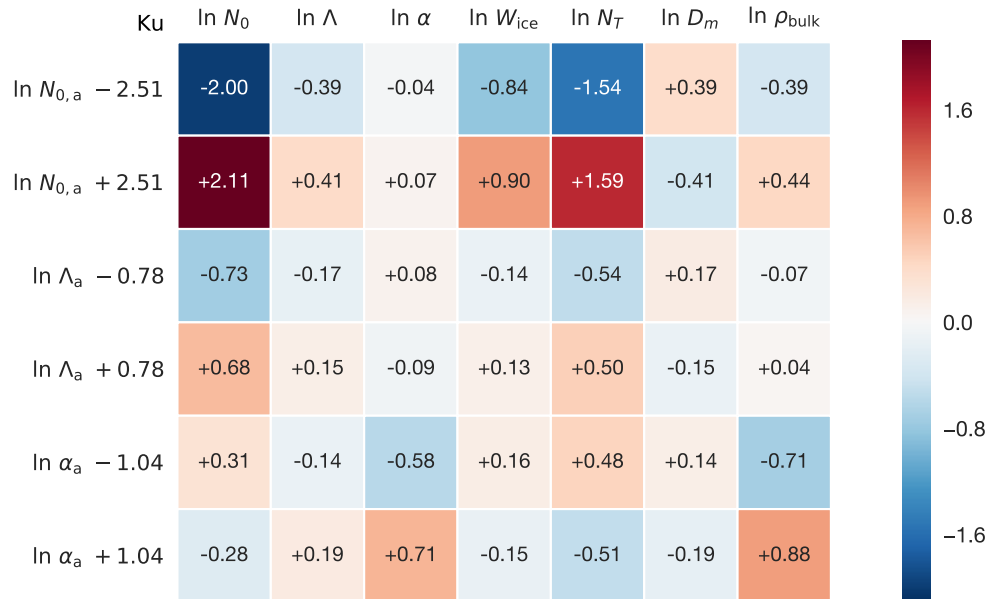

**Figure S26.** As Fig. S22, but retrieved using the Ku-band reflectivity only.

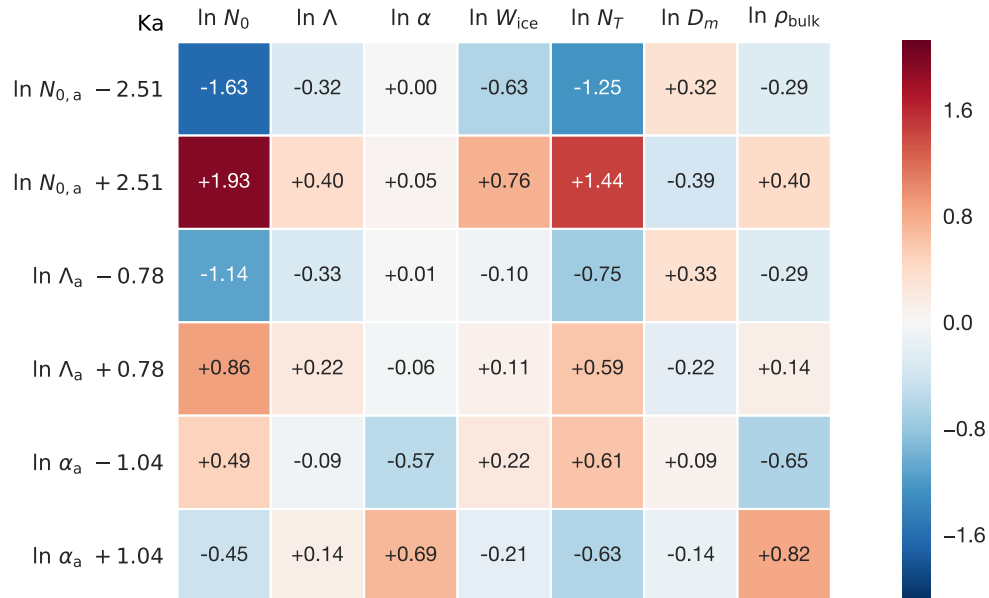

**Figure S27.** As Fig. S22, but retrieved using the Ka-band reflectivity only.

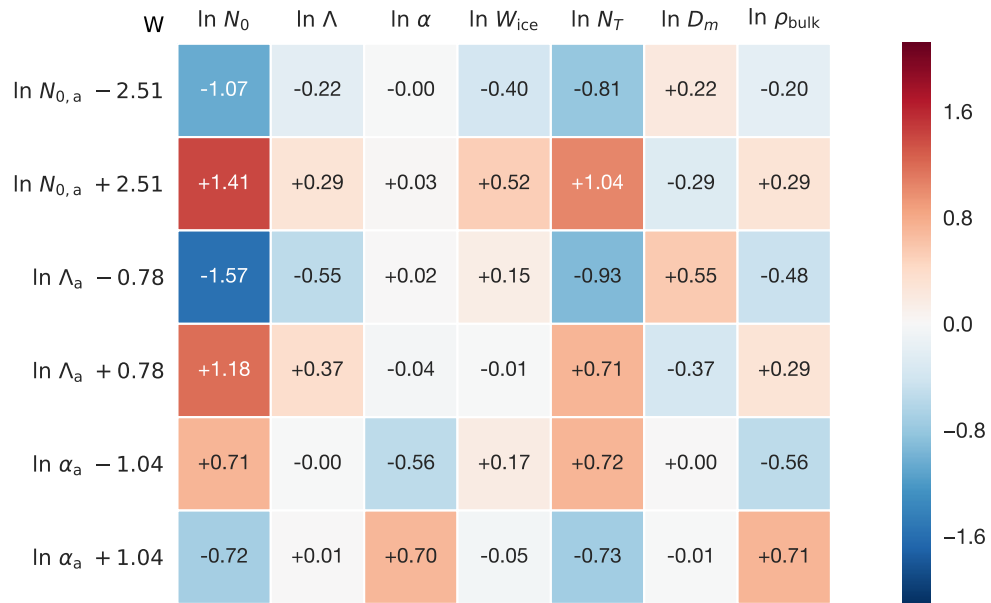

**Figure S28.** As Fig. S22, but retrieved using the W-band reflectivity only.
